# Supplementary material for: Loureirin hydrogel promotes healing of radionuclide-contaminated wounds by regulating angiogenesis and immune cells
Source: Royal Society of Chemistry journal article supplement (doi:10.1039/d4bm00813h), 2024-01-01
Supplement: d4bm00813h1.pdf [file d4bm00813h1.pdf]

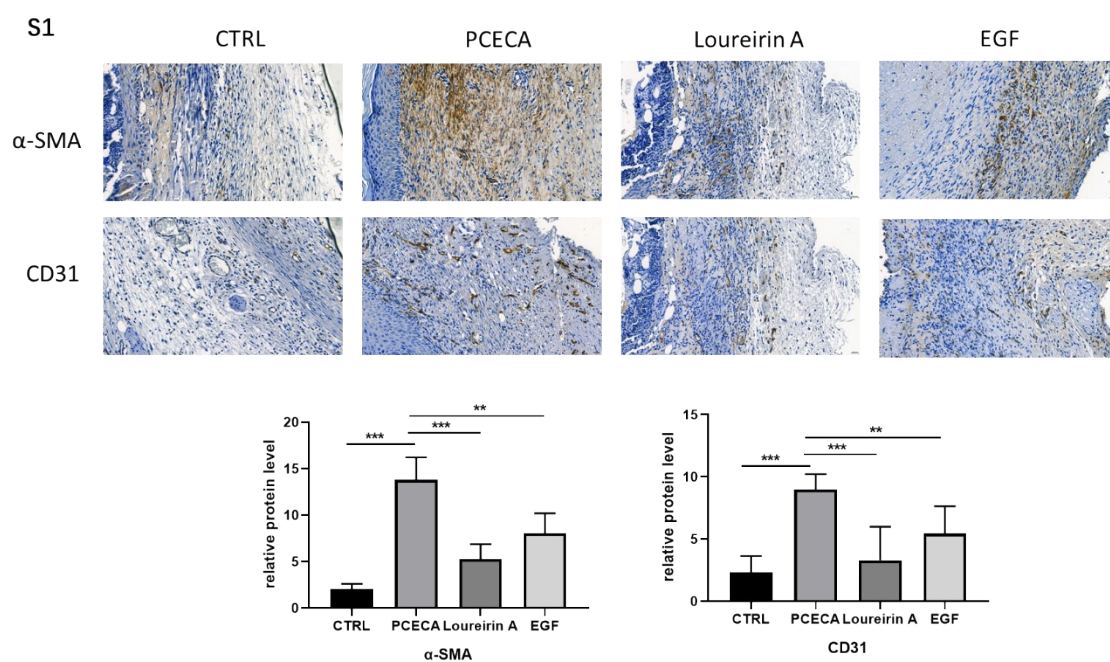

**Figure S1**

Immunohistochemical staining results of CD31 and  $\alpha$ -SMA in the skin of mice in the CTRL, PCECA, Loureirin A, and EGF groups 7 days after radionuclide staining of the wounds were plotted as well as quantitatively., \*  $p < 0.05$ , \*\*  $p < 0.01$ , \*\*\*  $p < 0.001$ ,  $n=5$ .

S2

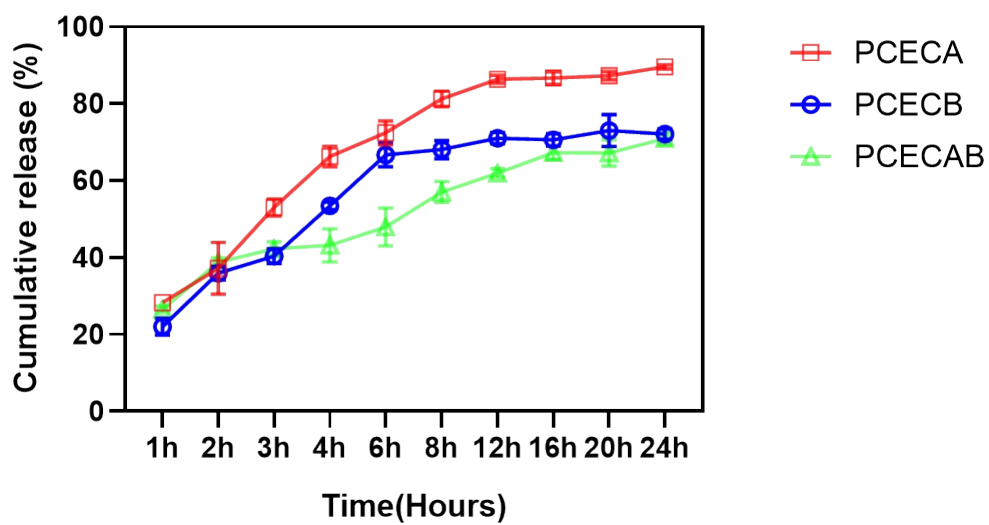

Figure S2

Drug release rates of PCECA hydrogels, PCECB hydrogels, and PCECAB hydrogels.

S3

### PCECA

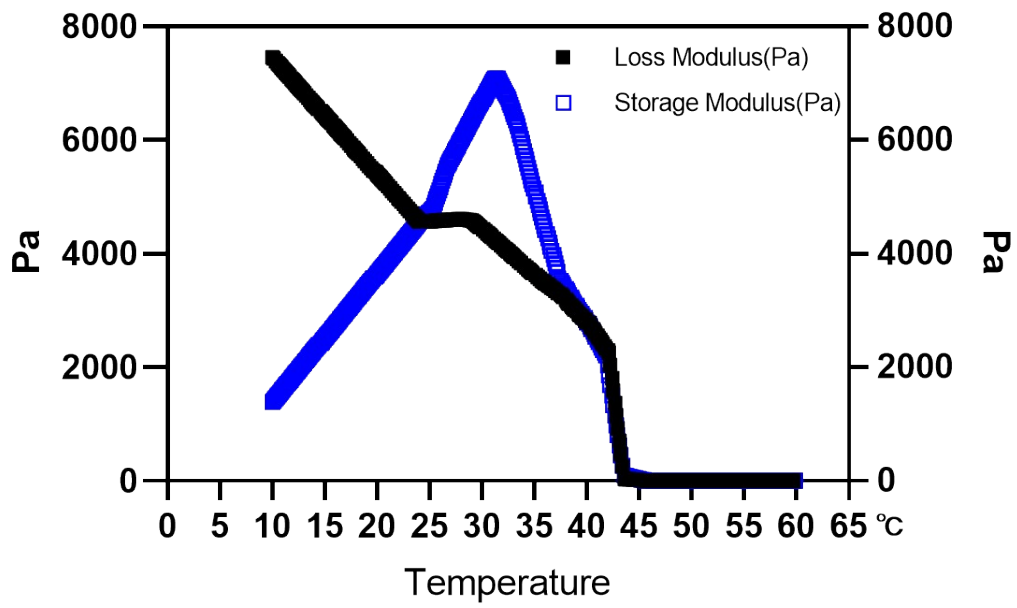

**Figure S3**

Rheological analyses of the PCECA hydrogels ( 20 wt.%) rheological analysis with temperature.

S4

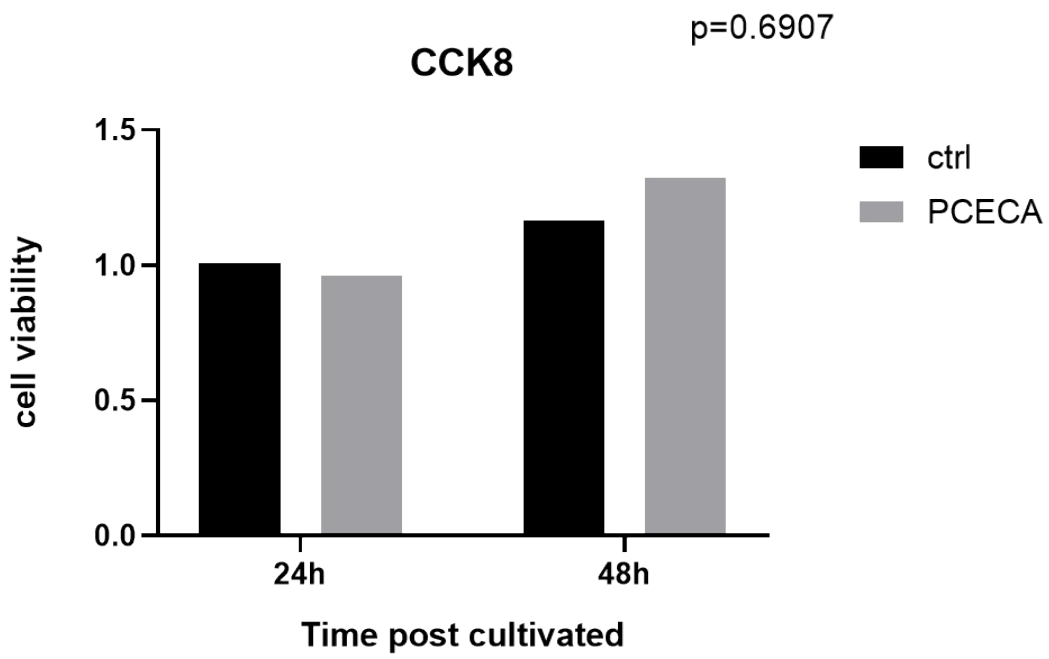

**Figure S4**

Rheological analyses of the PCECA hydrogels ( 20 wt.%) rheological analysis with temperature.
